# Supplementary material
Source: PubMed Central journal article supplement (PMC4224049)
Supplement: Supp_Fig1.pdf [file Supp_Fig1.pdf]

## Supplementary Data



**SUPPLEMENTARY FIG. S1. Chronic granulomatous disease (CGD) patients have impaired oxidative burst.** CGD patients have impaired oxidative burst on B cells, monocytes, and granulocytes. Total PBMCs were incubated for 10 min (for monocytes and granulocytes) or 30 min (B cells) with medium alone (*black line*) or PMA (*gray line*), after which the oxidation of dihydrorhodamin into rhodamin was measured by flow cytometry. Data are representative for individuals of each group.
