# Supplementary material
Source: PubMed Central journal article supplement (PMC4224049)
Supplement: Supp_Fig2.pdf [file Supp_Fig2.pdf]

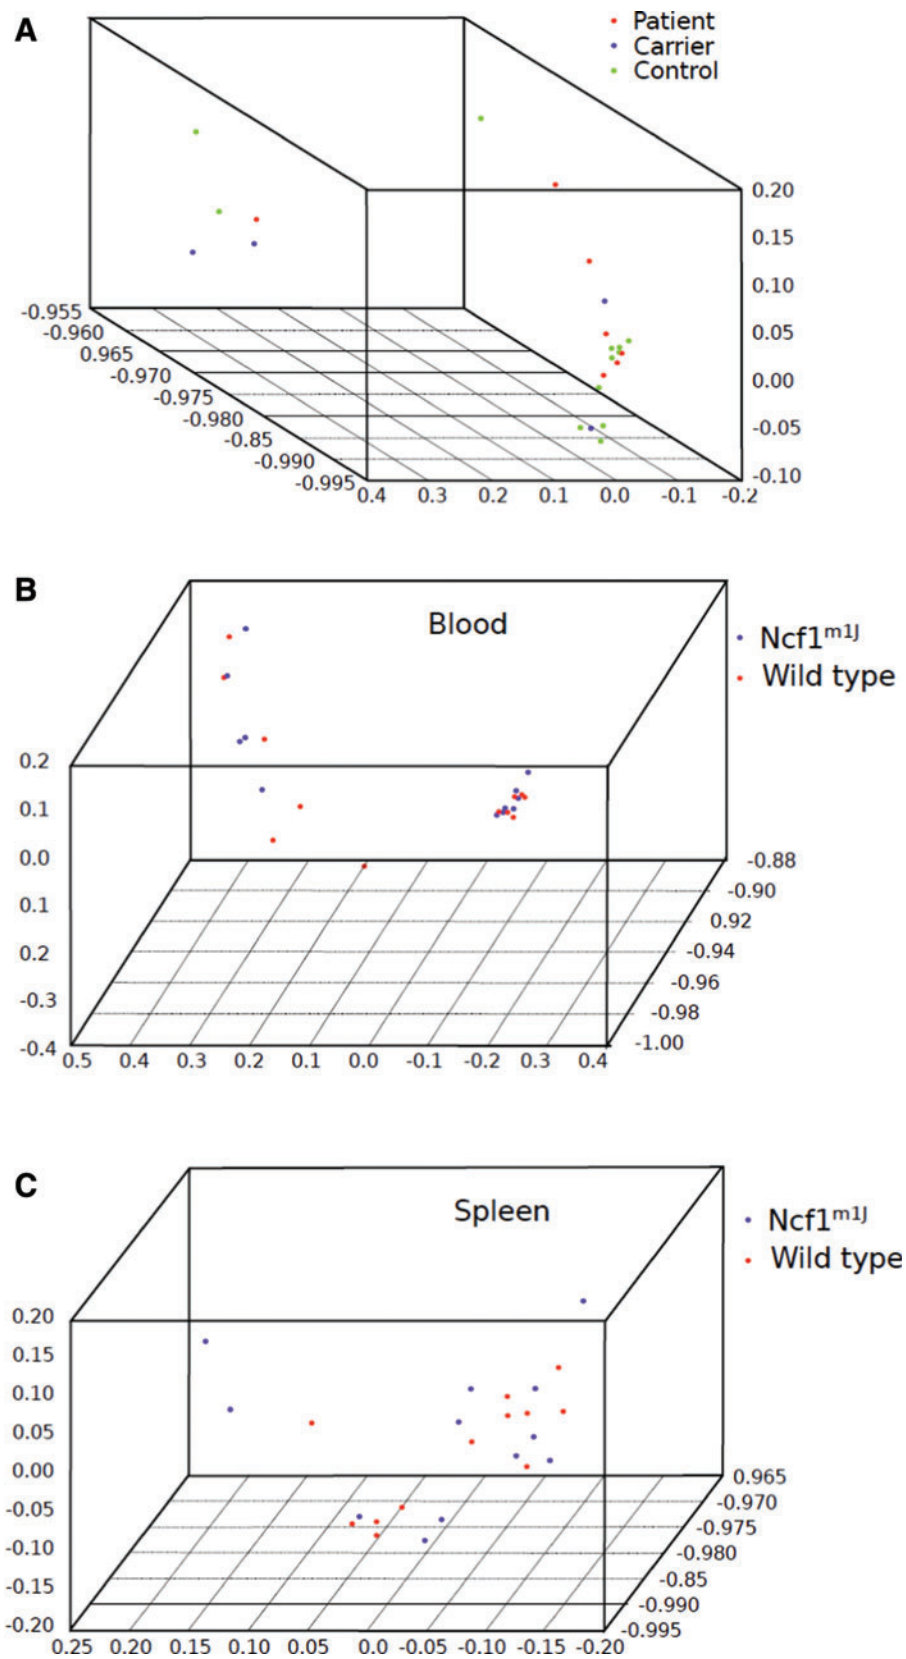

**SUPPLEMENTARY FIG. S2.** Principal component analysis (PCA) of all samples that were subjected to genome-wide gene expression profiling. PCA of the human samples is presented in (A), mouse blood samples in (B) and mouse spleen samples in (C).
