# Supplementary material
Source: PubMed Central journal article supplement (PMC4224049)
Supplement: Supp_Fig3.pdf [file Supp_Fig3.pdf]

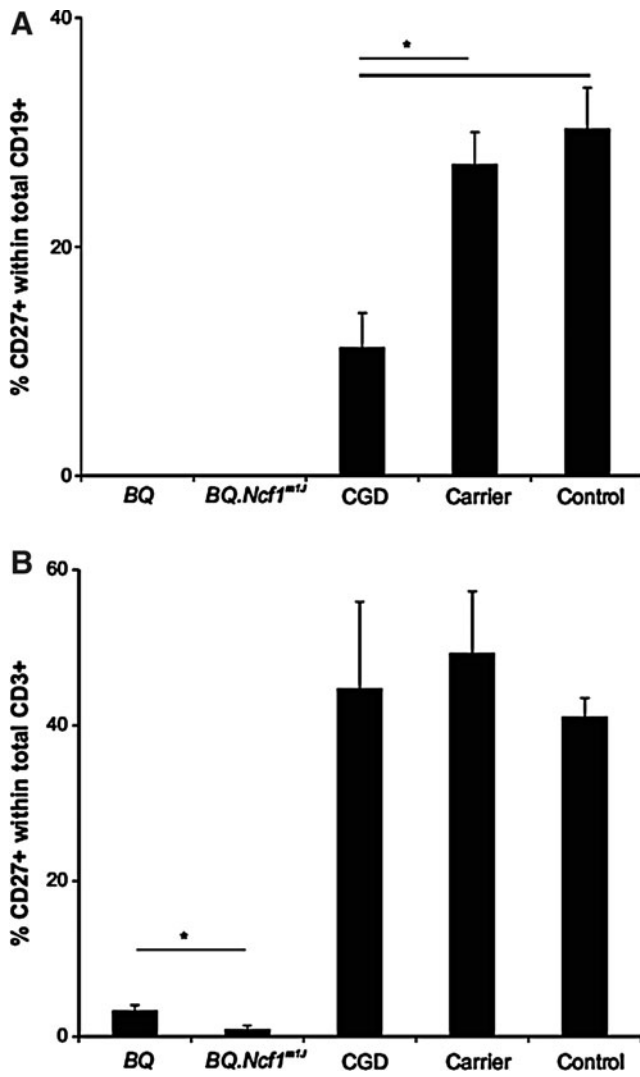

**SUPPLEMENTARY FIG. S3. CD27 expression on lymphocytes.** (A) Spleen samples from *BQ.Ncf1<sup>m1J</sup>* ( $n=5$ ), *BQ* ( $n=5$ ), CGD patients ( $n=7$ ), x-linked carriers ( $n=4$ ), and healthy controls ( $n=13$ ) were analyzed by flow cytometry for the relative frequency of CD27<sup>+</sup> cells within their splenic CD19<sup>+</sup> B lymphocytes and (B) CD3<sup>+</sup>T lymphocyte compartments. Bars represent average frequencies, error bars denote standard error of means, two-tailed Mann-Whitney *U* test, \* $p < 0.05$ .
