# Supplementary material
Source: PubMed Central journal article supplement (PMC4224049)
Supplement: Supp_Table1.pdf [file Supp_Table1.pdf]

SUPPLEMENTARY TABLE S1. PCR CONFIRMATIONS IN HUMAN SAMPLES

| <i>Gene</i>      | <i>Forward primer</i> | <i>Reverse primer</i>   | <i>Probe</i> | <i>FC array</i>   | <i>p-Value array</i> | <i>FC PCR</i> | <i>p-Value PCR</i> | <i>Conf?</i> |
|------------------|-----------------------|-------------------------|--------------|-------------------|----------------------|---------------|--------------------|--------------|
| <i>RPS9</i>      | ctgctgacgcttgatgagaa  | cagcttcattcttgcctca     | #28          | Housekeeping gene |                      |               |                    |              |
| <i>LY6E</i>      | gccatcctctccagaatgaa  | gcttcaggcagtagacattgc   | #71          | 4.60              | 6.29E-04             | 6.42          | 1.64E-04           | **           |
| <i>LOC652694</i> | gtcagtcccaaccaggacac  | atggagactgggtcatctgg    | #18          | 3.20              | 6.29E-04             | 4.10          | 3.40E-03           | **           |
| <i>OAS2</i>      | ctggcaaaagaagcaaaagga | ttcctgggtgtctgcattgtc   | #55          | 2.82              | 6.29E-04             | 5.42          | 1.66E-03           | **           |
| <i>VPREB3</i>    | atggggaccttctgtcagt   | acttggcctgggaagacc      | #42          | 3.10              | 7.43E-04             | 3.69          | 3.54E-04           | **           |
| <i>IFI27</i>     | ccaagcttaagacggtgagg  | ccgtggcctagagagtaagaga  | #41          | 28.89             | 9.00E-04             | 53.95         | 1.45E-05           | **           |
| <i>CD19</i>      | tccacctggagatcactgct  | gaccttcagccaccagtc      | #66          | 2.34              | 1.21E-03             | 3.44          | 5.52E-04           | **           |
| <i>ISG15</i>     | gcgaactcatctttgccagt  | agcatcttcaccgtcaggtc    | #76          | 4.71              | 1.58E-03             | 7.89          | 8.89E-04           | **           |
| <i>FBXO6</i>     | gagggggagacagcttcag   | ctttggagtggggagcadc     | #81          | 1.95              | 1.58E-03             | 2.49          | 8.45E-03           | **           |
| <i>CD79B</i>     | cttctgctgctggacaag    | gtccagggcctcgtaggt      | #69          | 2.22              | 1.61E-03             | 2.49          | 9.31E-03           | **           |
| <i>XAF1</i>      | ctcgggtgtcaggaaactgta | aagcctcatggagggtgaa     | #53          | 2.99              | 1.61E-03             | 3.62          | 3.95E-03           | **           |
| <i>IGF2R</i>     | tggtgtaccctgacagatg   | cgagtcgagtcacatt        | #17          | -2.35             | 2.03E-03             | -1.30         | 3.81E-01           | —            |
| <i>DPEP2</i>     | acatcaaggctgtcattgga  | cagccctgagggaaatt       | #22          | -1.78             | 2.53E-03             | -1.73         | 5.30E-02           | —            |
| <i>TYK2</i>      | ccatggcttgaagatgg     | ggccacacattaccatga      | #80          | -1.36             | 3.08E-03             | 1.03          | 8.79E-01           | —            |
| <i>ULK1</i>      | tcattctcagccacgctgt   | cacgggtgtggaacatctc     | #37          | -1.76             | 4.77E-03             | -1.27         | 4.45E-01           | —            |
| <i>CLDN14</i>    | ggcctgttctactctgaa    | cggtagatctggcactggtag   | #58          | -1.56             | 5.64E-03             | -1.61         | 4.78E-01           | —            |
| <i>ARAP3</i>     | accacctggaaggacgtg    | gggagctgctgtctatataaact | #19          | -2.27             | 5.64E-03             | -1.72         | 1.35E-01           | —            |
| <i>TPRG1L</i>    | aaatacgacttcagctccagt | tcgaatccaaaaccttctc     | #62          | -1.42             | 5.64E-03             | -1.22         | 4.13E-01           | —            |
| <i>PLEKHG3</i>   | aaaggtggccctgagag     | caccggcttctcttacctt     | #19          | -1.83             | 5.64E-03             | -1.68         | 1.19E-01           | —            |
| <i>ABCC5</i>     | catccacgcctacaataaagg | gcatcgcacacgtaaacaaa    | #17          | -1.59             | 6.18E-03             | -1.37         | 1.79E-01           | —            |
| <i>DPEP3</i>     | tcgagcttgtgacctcagc   | aactgcgcagcacagaga      | #56          | -1.81             | 6.29E-03             | -1.82         | 6.95E-02           | —            |

Transcription levels of selected genes were confirmed by a quantitative real-time polymerase chain reaction.

\*\*Both FC and statistical significance replicated; — not replicated.
