# Supplementary material
Source: PubMed Central journal article supplement (PMC4224049)
Supplement: Supp_Table2.pdf [file Supp_Table2.pdf]

SUPPLEMENTARY TABLE S2. INGENUITY PATHWAY ANALYSIS COMPARING CHRONIC GRANULOMATOUS DISEASE PATIENTS AND THE HEALTHY CONTROLS

| <i>Pathway</i>                                                               | <i>-Log (p-value)</i> | <i>p-Value</i> | <i>n</i> | <i>Ratio</i> |
|------------------------------------------------------------------------------|-----------------------|----------------|----------|--------------|
| B-cell development                                                           | 4.59                  | 2.6E-05        | 8        | 1.35E-01     |
| Role of pattern recognition receptors in recognition of bacteria and viruses | 3.93                  | 1.2E-04        | 7        | 8.75E-02     |
| Interferon signaling                                                         | 3.03                  | 9.3E-04        | 4        | 1.33E-01     |
| B-cell receptor signaling                                                    | 2.74                  | 0.002          | 8        | 5.19E-02     |
| Systemic lupus erythematosus signaling                                       | 2.58                  | 0.003          | 7        | 4.35E-02     |
| Oxidative phosphorylation                                                    | 2.48                  | 0.003          | 7        | 4.24E-02     |
| IL-4 signaling                                                               | 2.47                  | 0.003          | 5        | 6.85E-02     |
| Nonsmall cell lung cancer signaling                                          | 2.44                  | 0.004          | 5        | 6.33E-02     |
| Glioma signaling                                                             | 2.40                  | 0.004          | 6        | 5.36E-02     |
| Altered T-cell and B-cell signaling in rheumatoid arthritis                  | 2.12                  | 0.008          | 5        | 5.49E-02     |
| Citrate cycle                                                                | 1.97                  | 0.011          | 3        | 5.17E-02     |
| Ubiquinone biosynthesis                                                      | 1.80                  | 0.016          | 4        | 3.36E-02     |
| Antigen presentation pathway                                                 | 1.78                  | 0.017          | 3        | 7.69E-02     |
| GM-CSF signaling                                                             | 1.78                  | 0.017          | 4        | 5.97E-02     |
| Oncostatin M signaling                                                       | 1.78                  | 0.017          | 3        | 8.57E-02     |
| Primary immunodeficiency signaling                                           | 1.72                  | 0.019          | 3        | 4.76E-02     |
| Fc $\gamma$ RIIB signaling in B lymphocytes                                  | 1.66                  | 0.022          | 3        | 5.36E-02     |
| iCOS-iCOSL signaling in T helper cells                                       | 1.65                  | 0.022          | 5        | 4.1E-02      |
| PKC $\theta$ signaling in T lymphocytes                                      | 1.56                  | 0.028          | 5        | 3.6E-02      |
| Melanoma signaling                                                           | 1.54                  | 0.029          | 3        | 6.52E-02     |

n, the number of transcripts associated with the indicated pathway.
