# Supplementary material
Source: PubMed Central journal article supplement (PMC4224049)
Supplement: Supp_Table3.pdf [file Supp_Table3.pdf]

SUPPLEMENTARY TABLE S3. FC FILTERED TOP GENES IN CGD COHORT (CGD/HEALTHY CONTROL)

| <i>Fold change</i> | <i>Adj. p-value</i> | <i>Symbol</i>    | <i>Category</i> | <i>Gene</i>                                                                              |
|--------------------|---------------------|------------------|-----------------|------------------------------------------------------------------------------------------|
| 28.9               | 9.0E-4              | <i>IFI27</i>     | IRG             | Interferon, alpha-inducible protein 27 (IFI27), transcript variant 2                     |
| 8.9                | 2.3E-3              | <i>IFI44L</i>    | IRG             | Interferon-induced protein 44-like (IFI44L)                                              |
| 5.5                | 1.1E-2              | <i>OTOF</i>      | Misc.           | Otoferlin (OTOF), transcript variant 4                                                   |
| 4.7                | 1.6E-3              | <i>ISG15</i>     | IRG             | ISG15 ubiquitin-like modifier (ISG15)                                                    |
| 4.6                | 6.3E-4              | <i>LY6E</i>      | IRG             | Lymphocyte antigen 6 complex, locus E (LY6E)                                             |
| 3.8                | 5.6E-3              | <i>EPSTI1</i>    | IRG             | Epithelial stromal interaction 1 (breast) (EPSTI1), transcript variant 2                 |
| 3.7                | 1.7E-2              | <i>IFI6</i>      | IRG             | Interferon, alpha-inducible protein 6 (IFI6), transcript variant 2                       |
| 3.3                | 9.7E-3              | <i>IFI44</i>     | IRG             | Interferon-induced protein 44 (IFI44)                                                    |
| 3.3                | 6.0E-3              | <i>OAS1</i>      | IRG             | 2',5'-oligoadenylate synthetase 1, 40/46 kDa (OAS1), transcript variant 3                |
| 3.2                | 4.6E-3              | <i>OAS1</i>      | IRG             | 2',5'-oligoadenylate synthetase 1, 40/46 kDa (OAS1), transcript variant 3                |
| 3.2                | 3.6E-2              | <i>SERPING1</i>  | IRG             | Serpin peptidase inhibitor, clade G (C1 inhibitor), member 1 (SERPING1), transcript 2    |
| 3.2                | 6.3E-4              | <i>LOC652694</i> | LC              | PREDICTED: similar to Ig kappa chain V-I region HK102 precursor (LOC652694)              |
| 3.2                | 2.3E-2              | <i>RSAD2</i>     | IRG             | Radical S-adenosyl methionine domain containing 2 (RSAD2)                                |
| 3.2                | 9.9E-3              | <i>MX1</i>       | IRG             | Myxovirus (influenza virus) resistance 1, interferon-inducible protein p78 (mouse) (MX1) |
| 3.1                | 5.6E-3              | <i>IFI6</i>      | IRG             | Interferon, alpha-inducible protein 6 (IFI6), transcript variant 3                       |
| 3.1                | 7.4E-4              | <i>VPREB3</i>    | LC              | Pre-B lymphocyte gene 3 (VPREB3)                                                         |
| 3.0                | 3.9E-2              | <i>OAS3</i>      | IRG             | 2'-5'-oligoadenylate synthetase 3, 100 kDa (OAS3)                                        |
| 2.9                | 1.5E-2              | <i>TCL1A</i>     | LC              | T-cell leukemia/lymphoma 1A (TCL1A), transcript variant 2                                |
| 2.8                | 1.7E-3              | <i>XAF1</i>      | IRG             | XIAP-associated factor 1 (XAF1), transcript variant 2                                    |
| 2.8                | 6.3E-4              | <i>OAS2</i>      | IRG             | 2'-5'-oligoadenylate synthetase 2, 69/71 kDa (OAS2), transcript variant 1                |
| 2.8                | 4.8E-2              | <i>HERC5</i>     | IRG             | Hect domain and RLD 5 (HERC5)                                                            |
| 2.6                | 2.7E-2              | <i>OASL</i>      | IRG             | 2'-5'-oligoadenylate synthetase-like (OASL), transcript variant 2                        |
| 2.5                | 4.6E-3              | <i>CD79A</i>     | LC              | CD79a molecule, immunoglobulin-associated alpha (CD79A), transcript variant 1            |
| 2.4                | 4.6E-3              | <i>CD79A</i>     | LC              | CD79a molecule, immunoglobulin-associated alpha (CD79A), transcript variant 2            |
| 2.4                | 1.7E-2              | <i>MAFA</i>      | Misc.           | v-maf musculoaponeurotic fibrosarcoma oncogene homolog A (avian) (MAFA)                  |
| 2.4                | 5.6E-3              | <i>LGALS3BP</i>  | IRG             | Lectin, galactoside-binding, soluble, 3 binding protein (LGALS3BP)                       |
| 2.4                | 6.3E-3              | <i>IFI35</i>     | IRG             | Interferon-induced protein 35 (IFI35)                                                    |
| 2.3                | 1.2E-3              | <i>CD19</i>      | LC              | CD19 molecule (CD19)                                                                     |
| 2.3                | 1.3E-2              | <i>LOC651751</i> | Misc.           | PREDICTED: similar to Ig kappa chain V-II region RPMI 6410 precursor (LOC651751)         |
| 2.3                | 2.2E-2              | <i>IRF7</i>      | IRG             | Interferon regulatory factor 7 (IRF7), transcript variant b                              |
| 2.2                | 1.6E-3              | <i>CD79B</i>     | LC              | CD79b molecule, immunoglobulin-associated beta (CD79B), transcript variant 3             |
| 2.2                | 1.0E-2              | <i>CD79B</i>     | LC              | CD79B antigen (immunoglobulin-associated beta) (CD79B), transcript variant 1             |
| 2.2                | 1.6E-3              | <i>CD79B</i>     | LC              | CD79B antigen (immunoglobulin-associated beta) (CD79B), transcript variant 2             |
| 2.1                | 7.5E-3              | <i>CD38</i>      | IRG             | CD38 molecule (CD38)                                                                     |
| 2.1                | 2.7E-2              | <i>IRF7</i>      | IRG             | Interferon regulatory factor 7 (IRF7), transcript variant b                              |
| 2.1                | 1.6E-3              | <i>7050201</i>   | Misc.           | 602145539F1 NIH_MGC_48 cDNA clone IMAGE:4309424 5, mRNA sequence                         |
| 2.1                | 1.6E-3              | <i>CD72</i>      | LC              | CD72 molecule (CD72)                                                                     |
| 2.1                | 1.3E-2              | <i>MT1A</i>      | IRG             | Metallothionein 1A (MT1A)                                                                |
| 2.0                | 4.8E-3              | <i>PRICKLE1</i>  | Misc.           | Prickle homolog 1 (Drosophila) (PRICKLE1)                                                |
| 2.0                | 1.6E-2              | <i>SAMD9L</i>    | IRG             | Sterile alpha motif domain containing 9-like (SAMD9L)                                    |
| 2.0                | 6.9E-3              | <i>EIF2AK2</i>   | IRG             | Eukaryotic translation initiation factor 2-alpha kinase 2 (EIF2AK2)                      |

CGD, chronic granulomatous disease; FC, fold change; IRG, interferon regulated gene.
