# Supplementary material
Source: PubMed Central journal article supplement (PMC4224049)
Supplement: Supp_Table4.pdf [file Supp_Table4.pdf]

SUPPLEMENTARY TABLE S4. FC FILTERED TOP UPREGULATED GENES IN MOUSE

| <i>Fold change</i>                                       | <i>Adj. p-value</i> | <i>Symbol</i>       | <i>Category</i> | <i>Gene</i>                                                                       |
|----------------------------------------------------------|---------------------|---------------------|-----------------|-----------------------------------------------------------------------------------|
| Mouse blood samples ( <i>BQ.Ncf1<sup>m1j</sup>/BQ</i> )  |                     |                     |                 |                                                                                   |
| 3.3                                                      | 6.2E-8              | <i>Serpina3f</i>    | Misc.           | Serine (or cysteine) peptidase inhibitor, clade A, member 3F ( <i>Serpina3f</i> ) |
| 2.7                                                      | 5.4E-5              | <i>Serpina3g</i>    | INFL            | Serine (or cysteine) peptidase inhibitor, clade A, member 3G ( <i>Serpina3g</i> ) |
| 2.3                                                      | 3.2E-2              | <i>Gbp2</i>         | IRG             | Guanylate nucleotide binding protein 2 ( <i>Gbp2</i> )                            |
| 2.3                                                      | 2.8E-2              | <i>Oasl2</i>        | IRG             | 2–5 oligoadenylate synthetase-like 2 ( <i>Oasl2</i> )                             |
| 1.9                                                      | 7.5E-5              | <i>Iigp2</i>        | IRG             | Interferon inducible GTPase 2 ( <i>Iigp2</i> )                                    |
| 1.7                                                      | 6.5E-3              | <i>Ffar2</i>        | INFL            | Free fatty acid receptor 2 ( <i>Ffar2</i> )                                       |
| 1.7                                                      | 3.9E-4              | <i>Irgm</i>         | IRG             | Immunity-related GTPase family, M ( <i>Irgm</i> )                                 |
| 1.6                                                      | 1.2E-4              | <i>LOC100044190</i> | Misc.           | PREDICTED: hypothetical protein LOC100044190 ( <i>LOC100044190</i> )              |
| 1.6                                                      | 2.8E-2              | <i>Stat1</i>        | IRG             | Signal transducer and activator of transcription 1 ( <i>Stat1</i> )               |
| 1.5                                                      | 3.2E-2              | <i>Ifitm3</i>       | IRG             | Interferon induced transmembrane protein 3 ( <i>Ifitm3</i> )                      |
| 1.5                                                      | 3.2E-2              | <i>Nrp1</i>         | LC              | Neuropilin 1 ( <i>Nrp1</i> )                                                      |
| -1.6                                                     | 5.4E-5              | <i>LOC100041103</i> | Misc.           | PREDICTED: hypothetical protein LOC100041103                                      |
| -1.5                                                     | 2.9E-4              | <i>Ncf1</i>         | IRG             | Neutrophil cytosolic factor 1 ( <i>Ncf1</i> )                                     |
| Mouse spleen samples ( <i>BQ.Ncf1<sup>m1j</sup>/BQ</i> ) |                     |                     |                 |                                                                                   |
| 2.8                                                      | 2.8E-2              | <i>Ltf</i>          | INFL            | Lactotransferrin ( <i>Ltf</i> )                                                   |
| 2.7                                                      | 8.7E-3              | <i>Ctsg</i>         | INFL            | Cathepsin G ( <i>Ctsg</i> )                                                       |
| 2.6                                                      | 4.2E-2              | <i>Prtn3</i>        | INFL            | Proteinase 3 ( <i>Prtn3</i> )                                                     |
| 2.6                                                      | 3.6E-2              | <i>Lcn2</i>         | INFL            | Lipocalin 2 ( <i>Lcn2</i> )                                                       |
| 2.6                                                      | 2.0E-2              | <i>Mpo</i>          | IRG             | Myeloperoxidase ( <i>Mpo</i> ), nuclear gene encoding mitochondrial protein       |
| -1.9                                                     | 4.0E-5              | <i>Cd8b1</i>        | LC              | CD8 antigen, beta chain 1 ( <i>Cd8b1</i> )                                        |
| -1.8                                                     | 1.3E-3              | <i>Cd8b1</i>        | LC              | CD8 antigen, beta chain 1 ( <i>Cd8b1</i> )                                        |
| -1.7                                                     | 1.6E-7              | <i>Ncf1</i>         | IRG             | Neutrophil cytosolic factor 1 ( <i>Ncf1</i> )                                     |
| -1.5                                                     | 8.7E-3              | <i>Cd27</i>         | IRG             | CD27 antigen ( <i>Cd27</i> ), transcript variant 1                                |

INFL, inflammation related gene.
