# Supplementary material
Source: PubMed Central journal article supplement (PMC4224049)
Supplement: Supp_Table5.pdf [file Supp_Table5.pdf]

SUPPLEMENTARY TABLE S5. REAGENTS USED FOR RNA PREPARATION FOR ARRAY  
AND QUANTITATIVE REAL-TIME POLYMERASE CHAIN REACTION ANALYSIS

| <i>Reagent</i>                    | <i>Purpose</i>  | <i>Tissue</i> | <i>Species</i> | <i>Experiment</i> |
|-----------------------------------|-----------------|---------------|----------------|-------------------|
| RnaLater (Ambion)                 | Preservation    | Spleen        | Mouse          | I & II            |
| Mouse ribopure-blood (Ambion)     | Preservation    | Blood         | Mouse          | I                 |
|                                   | RNA isolation   | Blood         | Mouse          | I                 |
| RNA protect animal blood (Qiagen) | Preservation    | Blood         | Mouse          | II                |
|                                   | RNA isolation   | Blood         | Mouse          | II                |
|                                   | Dnase treatment | Blood         | Mouse          | II                |
| Ribo pure (Ambion)                | RNA isolation   | Spleen        | Mouse          | I                 |
| Rneasy mini (Qiagen)              | RNA isolation   | Spleen        | Mouse          | II                |
| DNA-free (Ambion)                 | Dnase treatment | spleen        | Mouse          | I                 |
|                                   | Dnase treatment | Blood         | Mouse          | I                 |
| Dnase free Dnase set (Qiagen)     | Dnase treatment | Spleen        | Mouse          | II                |
| GLOBINclear-Mouse/Rat (Ambion)    | Globin removal  | Spleen        | Mouse          | I & II            |
|                                   | Globin removal  | Blood         | Mouse          | I & II            |
| LiCl precipitation (Ambion)       | Purification    | Blood         | Mouse          | I                 |
| PAXgene Blood RNA Kit             | Preservation    | Blood         | Human          |                   |
|                                   | RNA isolation   | Blood         | Human          |                   |
|                                   | Dnase treatment | Blood         | Human          |                   |
